# Supplementary material for: One-Week Elderberry Juice Treatment Increases Carbohydrate Oxidation After a Meal Tolerance Test and is Well Tolerated in Adults: A Randomized Controlled Pilot Study
Source: Preprints.org preprint supplement (doi:10.20944/preprints202303.0194.v1), 2023-03-10
Supplement: Supplementary file 1 [file supplementary]

## Sheet: insulin SAS AUC output
	Subject	period	treatment	sex	sequence	bmi	age	waist	positiveiAUC
	101	1	EB	F	1	27	49	96.7	7394.25
	101	2	PL	F	1	27	49	96.7	5700.75
	102	1	EB	M	1	26.4	54	95.5	4167.75
	102	2	PL	M	1	26.4	54	95.5	4137.75
	103	2	EB	F	2	26.55	64	83	3611.25
	103	1	PL	F	2	26.55	64	83	5737.5
	104	2	EB	F	2	31.6	63	94.6	23724
	104	1	PL	F	2	31.6	63	94.6	23666.2
	105	1	EB	F	1	28.7	54	99.3	8533.5
	105	2	PL	F	1	28.7	54	99.3	9222
	106	1	EB	F	1	29.3	69	105.5	10193.2
	106	2	PL	F	1	29.3	69	105.5	11129.2
	107	1	EB	F	1	25.1	64	96	9491.25
	107	2	PL	F	1	25.1	64	96	6528.75
	108	2	EB	F	2	28.85	46	81	5623.5
	108	1	PL	F	2	28.85	46	81	5416.5
	109	1	EB	F	1	39.7	41	121	9443.25
	109	2	PL	F	1	39.7	41	121	9231
	110	2	EB	M	2	30.3	58	116.1	3843.33
	110	1	PL	M	2	30.3	58	116.1	4186.5

## Sheet: insulin by timepoint
Subject	period	minute	insulin	treatment	sex	bmi	age	waist	sequence
101	1	0	12.95	EB	F	27	49	96.7	1
101	2	0	12.05	PL	F	27	49	96.7	1
102	1	0	10.45	EB	M	26.4	54	95.5	1
102	2	0	8.45	PL	M	26.4	54	95.5	1
103	2	0	6.25	EB	F	26.55	64	83	2
103	1	0	7.4	PL	F	26.55	64	83	2
104	2	0	21.4	EB	F	31.6	63	94.6	2
104	1	0	13.35	PL	F	31.6	63	94.6	2
105	1	0	7.4	EB	F	28.7	54	99.3	1
105	2	0	9.5	PL	F	28.7	54	99.3	1
106	1	0	9.55	EB	F	29.3	69	105.5	1
106	2	0	11.55	PL	F	29.3	69	105.5	1
107	1	0	13.55	EB	F	25.1	64	96	1
107	2	0	9.65	PL	F	25.1	64	96	1
108	2	0	4.6	EB	F	28.85	46	81	2
108	1	0	6.4	PL	F	28.85	46	81	2
109	1	0	18.15	EB	F	39.7	41	121	1
109	2	0	16.4	PL	F	39.7	41	121	1
110	2	0	7.05	EB	M	30.3	58	116.1	2
110	1	0	4.5	PL	M	30.3	58	116.1	2
101	1	30	79.8	EB	F	27	49	96.7	1
101	2	30	75.4	PL	F	27	49	96.7	1
102	1	30	56.4	EB	M	26.4	54	95.5	1
102	2	30	96.8	PL	M	26.4	54	95.5	1
103	2	30	41.6	EB	F	26.55	64	83	2
103	1	30	59.1	PL	F	26.55	64	83	2
104	2	30	130	EB	F	31.6	63	94.6	2
104	1	30	90.3	PL	F	31.6	63	94.6	2
105	1	30	76	EB	F	28.7	54	99.3	1
105	2	30	117	PL	F	28.7	54	99.3	1
106	1	30	85.3	EB	F	29.3	69	105.5	1
106	2	30	82.5	PL	F	29.3	69	105.5	1
107	1	30	40.3	EB	F	25.1	64	96	1
107	2	30	25.8	PL	F	25.1	64	96	1
108	2	30	51.5	EB	F	28.85	46	81	2
108	1	30	48.1	PL	F	28.85	46	81	2
109	1	30	126	EB	F	39.7	41	121	1
109	2	30	115	PL	F	39.7	41	121	1
110	2	30	45.5	EB	M	30.3	58	116.1	2
110	1	30	66.9	PL	M	30.3	58	116.1	2
101	1	60	74.4	EB	F	27	49	96.7	1
101	2	60	79.8	PL	F	27	49	96.7	1
102	1	60	55.7	EB	M	26.4	54	95.5	1
102	2	60	26.7	PL	M	26.4	54	95.5	1
103	2	60	35.2	EB	F	26.55	64	83	2
103	1	60	81.8	PL	F	26.55	64	83	2
104	2	60	162	EB	F	31.6	63	94.6	2
104	1	60	142	PL	F	31.6	63	94.6	2
105	1	60	114	EB	F	28.7	54	99.3	1
105	2	60	114	PL	F	28.7	54	99.3	1
106	1	60	87.2	EB	F	29.3	69	105.5	1
106	2	60	67.4	PL	F	29.3	69	105.5	1
107	1	60	78.8	EB	F	25.1	64	96	1
107	2	60	48.2	PL	F	25.1	64	96	1
108	2	60	57.5	EB	F	28.85	46	81	2
108	1	60	56.9	PL	F	28.85	46	81	2
109	1	60	54.2	EB	F	39.7	41	121	1
109	2	60	67.9	PL	F	39.7	41	121	1
110	2	60	59.9	EB	M	30.3	58	116.1	2
110	1	60	35.8	PL	M	30.3	58	116.1	2
101	1	90	54	EB	F	27	49	96.7	1
101	2	90	46	PL	F	27	49	96.7	1
102	1	90	23.4	EB	M	26.4	54	95.5	1
102	2	90	23.5	PL	M	26.4	54	95.5	1
103	2	90	31	EB	F	26.55	64	83	2
103	1	90	50.4	PL	F	26.55	64	83	2
104	2	90	168	EB	F	31.6	63	94.6	2
104	1	90	161	PL	F	31.6	63	94.6	2
105	1	90	73.5	EB	F	28.7	54	99.3	1
105	2	90	56.1	PL	F	28.7	54	99.3	1
106	1	90	93.2	EB	F	29.3	69	105.5	1
106	2	90	102	PL	F	29.3	69	105.5	1
107	1	90	97	EB	F	25.1	64	96	1
107	2	90	61.2	PL	F	25.1	64	96	1
108	2	90	49.5	EB	F	28.85	46	81	2
108	1	90	39.6	PL	F	28.85	46	81	2
109	1	90	97.3	EB	F	39.7	41	121	1
109	2	90	82	PL	F	39.7	41	121	1
110	2	90	29.6	EB	M	30.3	58	116.1	2
110	1	90	27.2	PL	M	30.3	58	116.1	2
101	1	120	39.4	EB	F	27	49	96.7	1
101	2	120	30.4	PL	F	27	49	96.7	1
102	1	120	24.1	EB	M	26.4	54	95.5	1
102	2	120	20.1	PL	M	26.4	54	95.5	1
103	2	120	17.1	EB	F	26.55	64	83	2
103	1	120	14	PL	F	26.55	64	83	2
104	2	120	198	EB	F	31.6	63	94.6	2
104	1	120	204	PL	F	31.6	63	94.6	2
105	1	120	43.7	EB	F	28.7	54	99.3	1
105	2	120	48.3	PL	F	28.7	54	99.3	1
106	1	120	49.8	EB	F	29.3	69	105.5	1
106	2	120	80.9	PL	F	29.3	69	105.5	1
107	1	120	103	EB	F	25.1	64	96	1
107	2	120	71.3	PL	F	25.1	64	96	1
108	2	120	31.7	EB	F	28.85	46	81	2
108	1	120	45.1	PL	F	28.85	46	81	2
109	1	120	82.5	EB	F	39.7	41	121	1
109	2	120	63.1	PL	F	39.7	41	121	1
110	2	120	18.3	EB	M	30.3	58	116.1	2
110	1	120	21.6	PL	M	30.3	58	116.1	2
101	1	150	56.3	EB	F	27	49	96.7	1
101	2	150	16.6	PL	F	27	49	96.7	1
102	1	150	30.1	EB	M	26.4	54	95.5	1
102	2	150	12.8	PL	M	26.4	54	95.5	1
103	2	150	22.8	EB	F	26.55	64	83	2
103	1	150	15.9	PL	F	26.55	64	83	2
104	2	150	185	EB	F	31.6	63	94.6	2
104	1	150	199	PL	F	31.6	63	94.6	2
105	1	150	13.4	EB	F	28.7	54	99.3	1
105	2	150	15.1	PL	F	28.7	54	99.3	1
106	1	150	64.7	EB	F	29.3	69	105.5	1
106	2	150	80.8	PL	F	29.3	69	105.5	1
107	1	150	51.7	EB	F	25.1	64	96	1
107	2	150	39.1	PL	F	25.1	64	96	1
108	2	150	19.1	EB	F	28.85	46	81	2
108	1	150	21.2	PL	F	28.85	46	81	2
109	1	150	29.7	EB	F	39.7	41	121	1
109	2	150	55.9	PL	F	39.7	41	121	1
110	2	150	10.4	EB	M	30.3	58	116.1	2
110	1	150	9.9	PL	M	30.3	58	116.1	2
101	1	180	27.6	EB	F	27	49	96.7	1
101	2	180	16.2	PL	F	27	49	96.7	1
102	1	180	13.4	EB	M	26.4	54	95.5	1
102	2	180	9	PL	M	26.4	54	95.5	1
103	2	180	14.1	EB	F	26.55	64	83	2
103	1	180	21.5	PL	F	26.55	64	83	2
104	2	180	131	EB	F	31.6	63	94.6	2
104	1	180	132	PL	F	31.6	63	94.6	2
105	1	180	9.1	EB	F	28.7	54	99.3	1
105	2	180	18.3	PL	F	28.7	54	99.3	1
106	1	180	24.2	EB	F	29.3	69	105.5	1
106	2	180	41.8	PL	F	29.3	69	105.5	1
107	1	180	40.2	EB	F	25.1	64	96	1
107	2	180	50.2	PL	F	25.1	64	96	1
108	2	180	6.9	EB	F	28.85	46	81	2
108	1	180	9.7	PL	F	28.85	46	81	2
109	1	180	49.8	EB	F	39.7	41	121	1
109	2	180	28	PL	F	39.7	41	121	1
110	2	180	6.2	EB	M	30.3	58	116.1	2
110	1	180	5.8	PL	M	30.3	58	116.1	2

## Sheet: glucose SAS AUC output
	Subject	period	treatment	sex	sequence	bmi	age	waist	positiveiAUC
	101	1	EB	F	1	27	49	96.7	3885
	101	2	PL	F	1	27	49	96.7	3490.14
	102	1	EB	M	1	26.4	54	95.5	1654.29
	102	2	PL	M	1	26.4	54	95.5	1800.37
	103	2	EB	F	2	26.55	64	83	442.721
	103	1	PL	F	2	26.55	64	83	1005.85
	104	2	EB	F	2	31.6	63	94.6	6592.5
	104	1	PL	F	2	31.6	63	94.6	9375
	105	1	EB	F	1	28.7	54	99.3	2704.75
	105	2	PL	F	1	28.7	54	99.3	1897.06
	106	1	EB	F	1	29.3	69	105.5	3944.36
	106	2	PL	F	1	29.3	69	105.5	8347.5
	107	1	EB	F	1	25.1	64	96	27015
	107	2	PL	F	1	25.1	64	96	20775
	108	2	EB	F	2	28.85	46	81	3068.44
	108	1	PL	F	2	28.85	46	81	1034.91
	109	1	EB	F	1	39.7	41	121	3770.63
	109	2	PL	F	1	39.7	41	121	3192.38
	110	2	EB	M	2	30.3	58	116.1	3037.88
	110	1	PL	M	2	30.3	58	116.1	5602.88

## Sheet: glucose by timepoint
Subject	period	minute	glucose	treatment	sex	bmi	age	waist	sequence
101	1	0	96	EB	F	27	49	96.7	1
101	1	30	147	EB	F	27	49	96.7	1
101	1	60	105	EB	F	27	49	96.7	1
101	1	90	105	EB	F	27	49	96.7	1
101	1	120	118	EB	F	27	49	96.7	1
101	1	150	131	EB	F	27	49	96.7	1
101	1	180	103	EB	F	27	49	96.7	1
101	2	0	98	PL	F	27	49	96.7	1
101	2	30	148	PL	F	27	49	96.7	1
101	2	60	140	PL	F	27	49	96.7	1
101	2	90	124	PL	F	27	49	96.7	1
101	2	120	94	PL	F	27	49	96.7	1
101	2	150	92	PL	F	27	49	96.7	1
101	2	180	99	PL	F	27	49	96.7	1
102	1	0	104	EB	M	26.4	54	95.5	1
102	1	30	142	EB	M	26.4	54	95.5	1
102	1	60	124	EB	M	26.4	54	95.5	1
102	1	90	96	EB	M	26.4	54	95.5	1
102	1	120	91	EB	M	26.4	54	95.5	1
102	1	150	100	EB	M	26.4	54	95.5	1
102	1	180	87	EB	M	26.4	54	95.5	1
102	2	0	96	PL	M	26.4	54	95.5	1
102	2	30	148	PL	M	26.4	54	95.5	1
102	2	60	94	PL	M	26.4	54	95.5	1
102	2	90	107	PL	M	26.4	54	95.5	1
102	2	120	93	PL	M	26.4	54	95.5	1
102	2	150	87	PL	M	26.4	54	95.5	1
102	2	180	78	PL	M	26.4	54	95.5	1
103	2	0	91.5	EB	F	26.55	64	83	2
103	2	30	106	EB	F	26.55	64	83	2
103	2	60	92	EB	F	26.55	64	83	2
103	2	90	75	EB	F	26.55	64	83	2
103	2	120	71	EB	F	26.55	64	83	2
103	2	150	80	EB	F	26.55	64	83	2
103	2	180	56	EB	F	26.55	64	83	2
103	1	0	88.5	PL	F	26.55	64	83	2
103	1	30	117	PL	F	26.55	64	83	2
103	1	60	96	PL	F	26.55	64	83	2
103	1	90	74	PL	F	26.55	64	83	2
103	1	120	61	PL	F	26.55	64	83	2
103	1	150	64	PL	F	26.55	64	83	2
103	1	180	82	PL	F	26.55	64	83	2
104	2	0	97.5	EB	F	31.6	63	94.6	2
104	2	30	140	EB	F	31.6	63	94.6	2
104	2	60	144	EB	F	31.6	63	94.6	2
104	2	90	140	EB	F	31.6	63	94.6	2
104	2	120	142	EB	F	31.6	63	94.6	2
104	2	150	128	EB	F	31.6	63	94.6	2
104	2	180	124	EB	F	31.6	63	94.6	2
104	1	0	102	PL	F	31.6	63	94.6	2
104	1	30	147	PL	F	31.6	63	94.6	2
104	1	60	178	PL	F	31.6	63	94.6	2
104	1	90	173	PL	F	31.6	63	94.6	2
104	1	120	171	PL	F	31.6	63	94.6	2
104	1	150	147	PL	F	31.6	63	94.6	2
104	1	180	115	PL	F	31.6	63	94.6	2
105	1	0	95.5	EB	F	28.7	54	99.3	1
105	1	30	150	EB	F	28.7	54	99.3	1
105	1	60	121	EB	F	28.7	54	99.3	1
105	1	90	107	EB	F	28.7	54	99.3	1
105	1	120	92	EB	F	28.7	54	99.3	1
105	1	150	73	EB	F	28.7	54	99.3	1
105	1	180	75	EB	F	28.7	54	99.3	1
105	2	0	97	PL	F	28.7	54	99.3	1
105	2	30	150	PL	F	28.7	54	99.3	1
105	2	60	109	PL	F	28.7	54	99.3	1
105	2	90	92	PL	F	28.7	54	99.3	1
105	2	120	85	PL	F	28.7	54	99.3	1
105	2	150	71	PL	F	28.7	54	99.3	1
105	2	180	90	PL	F	28.7	54	99.3	1
106	1	0	107.5	EB	F	29.3	69	105.5	1
106	1	30	170	EB	F	29.3	69	105.5	1
106	1	60	154	EB	F	29.3	69	105.5	1
106	1	90	123	EB	F	29.3	69	105.5	1
106	1	120	102	EB	F	29.3	69	105.5	1
106	1	150	117	EB	F	29.3	69	105.5	1
106	1	180	110	EB	F	29.3	69	105.5	1
106	2	0	106.5	PL	F	29.3	69	105.5	1
106	2	30	165	PL	F	29.3	69	105.5	1
106	2	60	164	PL	F	29.3	69	105.5	1
106	2	90	173	PL	F	29.3	69	105.5	1
106	2	120	149	PL	F	29.3	69	105.5	1
106	2	150	147	PL	F	29.3	69	105.5	1
106	2	180	132	PL	F	29.3	69	105.5	1
107	1	0	145	EB	F	25.1	64	96	1
107	1	30	246	EB	F	25.1	64	96	1
107	1	60	333	EB	F	25.1	64	96	1
107	1	90	372	EB	F	25.1	64	96	1
107	1	120	337	EB	F	25.1	64	96	1
107	1	150	283	EB	F	25.1	64	96	1
107	1	180	254	EB	F	25.1	64	96	1
107	2	0	127	PL	F	25.1	64	96	1
107	2	30	202	PL	F	25.1	64	96	1
107	2	60	288	PL	F	25.1	64	96	1
107	2	90	288	PL	F	25.1	64	96	1
107	2	120	262	PL	F	25.1	64	96	1
107	2	150	233	PL	F	25.1	64	96	1
107	2	180	236	PL	F	25.1	64	96	1
108	2	0	93	EB	F	28.85	46	81	2
108	2	30	154	EB	F	28.85	46	81	2
108	2	60	119	EB	F	28.85	46	81	2
108	2	90	105	EB	F	28.85	46	81	2
108	2	120	98	EB	F	28.85	46	81	2
108	2	150	82	EB	F	28.85	46	81	2
108	2	180	81	EB	F	28.85	46	81	2
108	1	0	100.5	PL	F	28.85	46	81	2
108	1	30	137	PL	F	28.85	46	81	2
108	1	60	96	PL	F	28.85	46	81	2
108	1	90	72	PL	F	28.85	46	81	2
108	1	120	79	PL	F	28.85	46	81	2
108	1	150	68	PL	F	28.85	46	81	2
108	1	180	69	PL	F	28.85	46	81	2
109	1	0	106	EB	F	39.7	41	121	1
109	1	30	151	EB	F	39.7	41	121	1
109	1	60	126	EB	F	39.7	41	121	1
109	1	90	145	EB	F	39.7	41	121	1
109	1	120	129	EB	F	39.7	41	121	1
109	1	150	94	EB	F	39.7	41	121	1
109	1	180	117	EB	F	39.7	41	121	1
109	2	0	109	PL	F	39.7	41	121	1
109	2	30	158	PL	F	39.7	41	121	1
109	2	60	146	PL	F	39.7	41	121	1
109	2	90	129	PL	F	39.7	41	121	1
109	2	120	108	PL	F	39.7	41	121	1
109	2	150	111	PL	F	39.7	41	121	1
109	2	180	102	PL	F	39.7	41	121	1
110	2	0	99.5	EB	M	30.3	58	116.1	2
110	2	30	157	EB	M	30.3	58	116.1	2
110	2	60	143	EB	M	30.3	58	116.1	2
110	2	90	100	EB	M	30.3	58	116.1	2
110	2	120	90	EB	M	30.3	58	116.1	2
110	2	150	90	EB	M	30.3	58	116.1	2
110	2	180	85	EB	M	30.3	58	116.1	2
110	1	0	97.5	PL	M	30.3	58	116.1	2
110	1	30	200	PL	M	30.3	58	116.1	2
110	1	60	141	PL	M	30.3	58	116.1	2
110	1	90	129	PL	M	30.3	58	116.1	2
110	1	120	107	PL	M	30.3	58	116.1	2
110	1	150	97	PL	M	30.3	58	116.1	2
110	1	180	85	PL	M	30.3	58	116.1	2
