# Supplementary material for: One-Week Elderberry Juice Treatment Increases Carbohydrate Oxidation After a Meal Tolerance Test and is Well Tolerated in Adults: A Randomized Controlled Pilot Study
Source: Preprints.org preprint supplement (doi:10.20944/preprints202303.0194.v1), 2023-03-10
Supplement: Supplementary file 2 [file Exercise energetics.xlsx]

## Sheet: Sheet1
		Subject	Period	Treatment	Sex	Sequence	BMI	Age	Waist	CHO	FAT	EE	RQ
		101	1	EB	F	1	27	49	96.7	22.501	5.919	149.18	0.8839
		101	2	PL	F	1	27	49	96.7	19.375	8.577	161.38	0.8483
		102	1	EB	M	1	26.4	54	95.5	18.295	7.722	148.82	0.8511
		102	2	PL	M	1	26.4	54	95.5	15.988	6.916	131.65	0.851
		103	1	PL	F	2	26.55	64	83	13.237	6.995	120.97	0.8346
		103	2	EB	F	2	26.55	64	83	23.158	4.08	134.55	0.9123
		104	1	PL	F	2	31.6	63	94.6	22.847	4.826	140.31	0.9011
		104	2	EB	F	2	31.6	63	94.6	16.802	8.313	148.23	0.8392
		105	1	EB	F	1	28.7	54	99.3	11.571	8.681	129.987	0.8103
		105	2	PL	F	1	28.7	54	99.3	11.251	9.955	140.64	0.7995
		106	1	EB	F	1	29.3	69	105.5	19.332	7.3	149.09	0.8585
		106	2	PL	F	1	29.3	69	105.5	20.34	6.65	147.15	0.8694
		107	1	EB	F	1	25.1	64	96	12.378	4.355	92.47	0.8641
		107	2	PL	F	1	25.1	64	96	19.357	6.85	144.95	0.8625
		108	1	PL	F	2	28.85	46	81	20.941	5.254	136.44	0.8886
		108	2	EB	F	2	28.85	46	81	23.441	5.27	146.955	0.8962
		109	1	EB	F	1	39.7	41	121	39.043	5.569	214.458	0.9237
		109	2	PL	F	1	39.7	41	121	31.252	9.556	219.841	0.8738
		110	1	PL	M	2	30.3	58	116.1	7.743	16.714	190.022	0.7538
		110	2	EB	M	2	30.3	58	116.1	18.011	15.481	220.934	0.8014
