# Supplementary material for: One-Week Elderberry Juice Treatment Increases Carbohydrate Oxidation After a Meal Tolerance Test and is Well Tolerated in Adults: A Randomized Controlled Pilot Study
Source: Preprints.org preprint supplement (doi:10.20944/preprints202303.0194.v1), 2023-03-10
Supplement: Supplementary file 4 [file Postprandial MTT energetics.xlsx]

## Sheet: Sheet1
Participant ID	Diet Period	Interval	CHO (g)	Fat (g)	EE (Kcal)	Mean RQ	treatment	sex	bmi	age	waist	sequence
101	1	1	.	.	.	.	EB	F	27	49	96.7	1
101	1	2	.	.	.	.	EB	F	27	49	96.7	1
101	1	3	2.70912	1.09376	21.5644	0.854007	EB	F	27	49	96.7	1
101	1	4	3.8148	1.06952	25.91	0.881158	EB	F	27	49	96.7	1
101	1	5	3.61442	1.0895	25.27	0.875737	EB	F	27	49	96.7	1
101	1	6	2.79315	1.59932	26.69	0.8292	EB	F	27	49	96.7	1
101	2	1	1.111	1.002	14.08	0.7983	PL	F	27	49	96.7	1
101	2	2	1.84287	2.33019	29.64	0.77825	PL	F	27	49	96.7	1
101	2	3	1.72453	2.56263	31.33	0.77015	PL	F	27	49	96.7	1
101	2	4	2.00797	2.41907	31.18	0.7811	PL	F	27	49	96.7	1
101	2	5	1.10976	2.48032	28.04	0.75235	PL	F	27	49	96.7	1
101	2	6	1.91855	2.08885	27.7	0.7867	PL	F	27	49	96.7	1
102	2	1	1.415	1.27	17.87	0.8007	PL	M	26.4	54	95.5	1
102	2	2	2.308	2.816	36.16	0.781	PL	M	26.4	54	95.5	1
102	2	3	1.447	2.964	33.98	0.75505	PL	M	26.4	54	95.5	1
102	2	4	1.115	3.033	33.29	0.7446	PL	M	26.4	54	95.5	1
102	2	5	1.109	2.999	32.96	0.74325	PL	M	26.4	54	95.5	1
102	2	6	2.064	2.512	32.29	0.78065	PL	M	26.4	54	95.5	1
103	2	1	1.967	0.342	11.4	0.9135	EB	F	26.55	64	83	2
103	2	2	3.673	0.894	23.67	0.8907	EB	F	26.55	64	83	2
103	2	3	3.656	0.953	24.16	0.8846	EB	F	26.55	64	83	2
103	2	4	2.92	1.191	23.32	0.8517	EB	F	26.55	64	83	2
103	2	5	3.167	1.062	23.15	0.86825	EB	F	26.55	64	83	2
103	2	6	2.864	1.27	23.87	0.84745	EB	F	26.55	64	83	2
104	2	1	0.275	1.52	15.49	0.7266	EB	F	31.6	63	94.6	2
104	2	2	0.584	3.102	31.78	0.7278	EB	F	31.6	63	94.6	2
104	2	3	0.635	3.111	32.03	0.7295	EB	F	31.6	63	94.6	2
104	2	4	0.4	3.228	32.15	0.7208	EB	F	31.6	63	94.6	2
104	2	5	1.344	2.881	32.81	0.75345	EB	F	31.6	63	94.6	2
104	2	6	0.614	2.935	30.3	0.73	EB	F	31.6	63	94.6	2
105	1	1	.	.	.	.	EB	F	28.7	54	99.3	1
105	1	2	.	.	.	.	EB	F	28.7	54	99.3	1
105	1	3	2.171	1.106	19.43	0.838467	EB	F	28.7	54	99.3	1
105	1	4	3.221	1.29	25.54	0.8537	EB	F	28.7	54	99.3	1
105	1	5	3.01	1.317	24.93	0.84865	EB	F	28.7	54	99.3	1
105	1	6	2.604	1.423	24.23	0.8319	EB	F	28.7	54	99.3	1
105	2	1	0.931	0.924	12.59	0.7924	PL	F	28.7	54	99.3	1
105	2	2	2.938	1.523	26.57	0.83635	PL	F	28.7	54	99.3	1
105	2	3	2.112	1.814	25.91	0.801	PL	F	28.7	54	99.3	1
105	2	4	2.48	1.707	26.42	0.81675	PL	F	28.7	54	99.3	1
105	2	5	2.064	1.871	26.21	0.79815	PL	F	28.7	54	99.3	1
105	2	6	1.986	1.836	25.56	0.79625	PL	F	28.7	54	99.3	1
106	1	1	1.848	0.307	10.56	0.9158	EB	F	29.3	69	105.5	1
106	1	2	2.707	0.964	20.36	0.867842	EB	F	29.3	69	105.5	1
106	1	3	2.647	0.935	19.79	0.864737	EB	F	29.3	69	105.5	1
106	1	4	2.649	1.149	21.85	0.84995	EB	F	29.3	69	105.5	1
106	1	5	3.121	0.982	22.22	0.87395	EB	F	29.3	69	105.5	1
106	1	6	3.067	0.92	21.38	0.8762	EB	F	29.3	69	105.5	1
106	2	1	0.848	0.794	11.03	0.796	PL	F	29.3	69	105.5	1
106	2	2	3.057	0.865	20.86	0.88005	PL	F	29.3	69	105.5	1
106	2	3	3.365	0.827	21.77	0.88995	PL	F	29.3	69	105.5	1
106	2	4	2.184	1.327	21.58	0.8244	PL	F	29.3	69	105.5	1
106	2	5	2.261	1.364	22.24	0.82485	PL	F	29.3	69	105.5	1
106	2	6	2.209	1.38	22.19	0.82345	PL	F	29.3	69	105.5	1
108	2	1	2.655	0.17	12.61	0.9601	EB	F	28.85	46	81	2
108	2	2	4.62846	0.461734	23.5482	0.942004	EB	F	28.85	46	81	2
108	2	3	5.26305	0.515527	26.6869	0.948318	EB	F	28.85	46	81	2
108	2	4	6.45212	0.113098	27.8132	0.988035	EB	F	28.85	46	81	2
108	2	5	4.40047	0.832621	26.1077	0.906928	EB	F	28.85	46	81	2
108	2	6	3.83751	0.80828	23.5441	0.901405	EB	F	28.85	46	81	2
108	1	1	3.201	-0.043	12.84	1.01	PL	F	28.85	46	81	2
108	1	2	6.66	0.001	27.59	1.0004	PL	F	28.85	46	81	2
108	1	3	5.752	0.588	22.24	0.9477	PL	F	28.85	46	81	2
108	1	4	5.102	0.541	26.28	0.93885	PL	F	28.85	46	81	2
108	1	5	3.523	0.878	22.9	0.88985	PL	F	28.85	46	81	2
108	1	6	3.786	0.862	23.84	0.8954	PL	F	28.85	46	81	2
109	1	1	2.364	0.43	13.86	0.9094	EB	F	39.7	41	121	1
109	1	2	5.04444	0.736922	27.8727	0.923431	EB	F	39.7	41	121	1
109	1	3	5.74918	0.454445	28.1248	0.952502	EB	F	39.7	41	121	1
109	1	4	4.65886	0.798452	26.8558	0.913795	EB	F	39.7	41	121	1
109	1	5	4.62206	0.859804	27.283	0.908005	EB	F	39.7	41	121	1
109	1	6	4.6327	0.82499	26.9982	0.911563	EB	F	39.7	41	121	1
109	2	1	1.766	0.718	14.1	0.854	PL	F	39.7	41	121	1
109	2	2	6.45856	0.241844	29.0564	0.975592	PL	F	39.7	41	121	1
109	2	3	4.27623	1.16755	28.7574	0.8827	PL	F	39.7	41	121	1
109	2	4	3.67638	1.40537	28.5181	0.858442	PL	F	39.7	41	121	1
109	2	5	3.62676	1.37434	28.0192	0.858714	PL	F	39.7	41	121	1
109	2	6	2.88733	1.64082	27.4722	0.829419	PL	F	39.7	41	121	1
110	2	1	3.365	0.45	18.2	0.9283	EB	M	30.3	58	116.1	2
110	2	2	8.72457	0.372018	39.6792	0.973005	EB	M	30.3	58	116.1	2
110	2	3	7.1585	1.00917	39.208	0.92583	EB	M	30.3	58	116.1	2
110	2	4	4.7292	1.69203	35.5908	0.863552	EB	M	30.3	58	116.1	2
110	2	5	4.51467	1.57972	33.6403	0.865255	EB	M	30.3	58	116.1	2
110	2	6	3.67898	1.66761	31.0068	0.846003	EB	M	30.3	58	116.1	2
110	1	1	3.026	0.423	16.54	0.9257	PL	M	30.3	58	116.1	2
110	1	2	7.07622	0.595913	34.9622	0.94982	PL	M	30.3	58	116.1	2
110	1	3	5.62666	1.11238	33.8338	0.904173	PL	M	30.3	58	116.1	2
110	1	4	3.59836	1.77352	31.6733	0.838978	PL	M	30.3	58	116.1	2
110	1	5	3.21569	1.85472	30.8543	0.828654	PL	M	30.3	58	116.1	2
110	1	6	2.25059	2.09422	29.117	0.796691	PL	M	30.3	58	116.1	2
